# Supplementary material for: Food intake and inflammation in European children: the IDEFICS study
Source: Springer Nature journal article supplement (doi:10.1007/s00394-015-1054-3), 2015-09-29
Supplement: MOESM1 [file 8392462]

|  | ***Aged 2-<6 years*** | | | |
| --- | --- | --- | --- | --- |
|  | **CRP I** | **CRP II** | **CRP III** | **p-value** |
| **Food items** | **Mean (95% CI)** | **Mean (95%CI)** | **Mean (95%CI)** |  |
| Cooked vegetables | 4.427(4.108-4.747) | 4.385(4.095-4.674) | 3.801(3.490-4.112)* † | 0.008 |
| Fried potatoes | 0.887(0.737-1.037) | 0.930(0.791-1.068) | 0.905(0.758-1.052) | 0.918 |
| Raw vegetables | 4.852 (4.382-5.323) | 4.395(3.967-4.824) | 4.068(3.608-4.527) | 0.068 |
| Fresh fruit | 8.229 (7.649-8.808) | 7.523(7.001-8.045) | 7.542(6.981-8.103) | 0.149 |
| Fresh fruit with sugar added | 1.588 (1.201-1.975) | 1.583(1.232-1.933) | 1.634(1.259-2.009) | 0.978 |
| Water | 20.439 (19.311-21.567) | 20.176 (19.155-21.198) | 20.860(19.760-21.960) | 0.668 |
| Fruit juice | 6.900(6.013-7.787) | 7.370(6.571-8.169) | 6.893(6.035-7.751) | 0.635 |
| Soft drink, sugar added | 1.806(1.240-2.373) | 2.534(2.017-3.051) | 2.551(1.997-3.104) | 0.111 |
| Soft drink, diet | 0.579(0.198-0.960) | 0.989 (0.639-1.338) | 0.948(0.577-1.319) | 0.251 |
| Breakfast cereals, sugar added | 2.017(1.677-2.357) | 2.252(1.944-2.560) | 2.139(1.809-2.468) | 0.606 |
| Breakfast cereals, no sugar | 1.882 (1.532-2.233) | 1.773(1.453-2.093) | 1.609(1.268-1.949) | 0.547 |
| Milk total | 10.957(10.098-11.815) | 11.403(10.616-12.190) | 10.836(9.987-11.685) | 0.590 |
| Yoghurt, no sugar | 1.404(1.105-1.703) | 1.527(1.254-1.801) | 1.489(1.197-1.781) | 0.835 |
| Yoghurt, sugar added | 3.618(3.217-4.019) | 3.740(3.378-4.102) | 3.649(3.260-4.037) | 0.896 |
| Fish not fried | 1.009(0.856-1.163) | 1.161(1.023-1.299) | 1.180(1.032-1.328) | 0.234 |
| Fish, fried | 1.033 (0.888-1.179) | 1.147(1.014-1.279) | 0.981(0.838-1.124) | 0.226 |
| Cold cuts, sausage | 4.153(3.763-4.543) | 4.124(3.767-4.481) | 3.953(3.571-4.335) | 0.736 |
| Meat,not fried ( cooked) | 2.295(2.029-2.560) | 2.237(1.993-2.482) | 2.337(2.077-2.598) | 0.857 |
| Meat, fried | 2.448(2.178-2.718) | 2.667(2.423-2.912) | 2.552(2.291-2.812) | 0.496 |
| Egg, fried | 1.017(0.868-1.166) | 0.955(0.820-1.091) | 0.938(0.794-1.083) | 0.740 |
| Egg, boiled | 1.001(0.866-1.136) | 0.888(0.765-1.011) | 0.740(0.608-0.871)* | 0.026 |
| Mayonnaise | 0.571(0.406-0.736) | 0.547(0.396-0.698)* | 0.810(0.648-0.972) | 0.042 |
| Meat replacement products | 0.044(-0.052-0.140) | 0.233(0.145-0.321) | 0.144(0.051-0.237) | 0.018 |
| Cheese | 8.699 (8.016-9.381) | 7.689(7.073-8.306) | 8.176(7.512-8.839) | 0.100 |
| Honey Jam | 1.872(1.609-2.134) | 1.701(1.461-1.941) | 1.497(1.240-1.755) | 0.141 |
| Chocolate_nut_based_spread | 1.518(1.246-1.791) | 1.818(1.570-2.065) | 1.999(1.733-2.264) | 0.047 |
| Butter, margarine on bread | 4.060(3.537-4.583) | 3.864(3.382-4.346) | 3.101(2.584-3.619) | 0.026 |
| Butter, margarine on bread low fat | 2.387(1.947-2.827) | 2.438(2.036-2.840) | 2.317(1.883-2.750) | 0.922 |
| Ketchup | 1.491(1.271-1.711) | 1.593(1.393-1.793) | 1.427(1.211-1.643) | 0.530 |
| Bread, white | 5.784(5.161-6.406) | 6.286(5.720-6.853) | 6.777(6.167-7.386) | 0.087 |
| Bread, wholemeal | 4.147(3.637-4.657) | 4.008(3.539-4.478) | 3.495(2.994-3.997) | 0.169 |
| Pasta,rice | 2.878(2.641-3.115) | 2.871(2.655-3.087) | 2.938(2.705-3.171) | 0.905 |
| Cereals, milled, | 0.399(0.236-0.561) | 0.507(0.358-0.655) | 0.694(0.537-0.851)* | 0.036 |
| Processed meals: pizza, main dished, hot dogs, hamburguers.. | 1.870(1.546-2.194) | 1.808(1.513-2.102) | 1.697(1.378-2.015) | 0.752 |
| Nuts,seed, dried fruit | 0.989(0.756-1.222) | 0.948(0.738-1.158) | 1.128(0.902-1.354) | 0.497 |
| Salty snacks | 0.909(0.756-1.062) | 0.968(0.828-1.107) | 0.984(0.834-1.134) | 0.773 |
| Savoury pastries | 0.676(0.539-0.812) | 0.675(0.550-0.800) | 0.525(0.391-0.659) | 0.193 |
| Chocolate | 1.823(1.560-2.087) | 1.983(1.741-2.224) | 1.842(1.582-2.102) | 0.622 |
| Candy, non chocolate | 2.091(1.770-2.413) | 2.260(1.968-2.553) | 2.261(1.944-2.578) | 0.697 |
| Cake, pudding, cookies | 2.431(2.109-2.753) | 2.513(2.219-2.807) | 2.721(2.403-3.038) | 0.433 |
| Ice cream | 1.853(1.591-2.114) | 1.662(1.422-1.902) | 1.688(1.430-1.947) | 0.539 |

**Table S1.1.** Supplementary material. Mean consumption frequencies and 95% confidence interval (CI), by high sensitive C-reactive protein (hs-CRP) categorie in younger girls, controlling by body mass index z-score [23]. CRP I: hs-CRP detection limit (0.02mg/dL); CRP II: hs-CRP > 0.02 mg/dL and < 50th sex-specific percentile (0.06 mg/dL in boys and 0.07 in girls); of those with hs-CRP values over the detection limit CRP III: hs-CRP ≥ 50th sex-specific percentile (0.06 mg/dL in boys and 0.07 in girls) of those with hs-CRP values above the detection limit. Post-hoc comparisons between hs-CRP groups with Bonferroni correction applied. *p<0.05 ref CRP I, † p<0.05 ref CRP II.
