# Supplementary material for: Food intake and inflammation in European children: the IDEFICS study
Source: Springer Nature journal article supplement (doi:10.1007/s00394-015-1054-3), 2015-09-29
Supplement: MOESM3 [file 8392462]

|  | ***Aged 2-<6 years*** | | | |
| --- | --- | --- | --- | --- |
|  | **CRP I** | **CRPII** | **CRPIII** | **p-value** |
| **Food items** | **Mean (95% CI)** | **Mean (95% CI)** | **Mean (95% CI)** |  |
| Cooked vegetables | 4.469 (4.176-4.762) | 4.525 (4.173-4.876) | 4.318 (3.973-4.663) | 0.688 |
| Fried potatoes | 1.099 (0.965-1.232) | 0.973 (0.811-1.135) | 1.078 (0.92-1.235) | 0.479 |
| Raw vegetables | 4.638 (4.24-5.036) | 4.286 (3.809-4.762) | 3.768 (3.297-4.239)* | 0.022 |
| Fresh fruit | 7.69 (7.190-8.190) | 8.016 (7.411-8.621) | 7.483 (6.889-8.079) | 0.460 |
| Fresh fruit witth sugar added | 1.932 (1.609-2.254) | 1.511 (1.122-1.900) | 1.886 (1.507-2.266) | 0.229 |
| Water | 20.253 (19.336-21.170) | 20.780 (19.670-21.889) | 21.411 (20.324-22.497) | 0.281 |
| Fruit juice | 6.988 (6.282-7.694) | 6.308 (5.462-7.154) | 7.379 (6.542-8.216) | 0.201 |
| Soft drink with sugar added | 2.554 (2.065-3.044) | 1.965 (1.371-2.559) | 2.800 (2.218-3.382) | 0.127 |
| Soft drink, diet | 1.020 (0.689-1.350) | 0.847(0.447-1.248) | 1.004 (0.608-1.400) | 0.790 |
| Breakfast cereals, sugar added | 2.339 (2.084-2.594) | 1.880 (1.573-2.188) | 2.169 (1.867-2.471) | 0.081 |
| Breakfast cereals, no sugar | 2.218(1.899-2.536) | 2.360(1.981-2.738) | 1.746 (1.366-2.125) | 0.059 |
| Milk total | 11.502 (10.780-12.223) | 11.272 (10.400-12.143) | 11.359 (10.509-12.209) | 0.920 |
| Yoghurt, no sugar | 1.522 (1.252-1.792) | 1.667 (1.346-1.989) | 1.448 (1.129-1.767) | 0.624 |
| Yoghurt, sugar added | 4.107 (3.713-4.5) | 4.292 (3.819-4.765) | 4.458 (3.991-4.924) | 0.526 |
| Fish not fried | 1.087 (0.950-1.223) | 1.086 (0.923-1.250) | 1.219 (1.059-1.378) | 0.396 |
| Fish, fried | 1.14 (0.998-1.282) | 1.080 (0.910-1.251) | 1.248 (1.081-1.416) | 0.371 |
| Cold cuts, sausage | 4.165 (3.819-4.510) | 4.008 (3.59-4.426) | 4.043 (3.634-4.451) | 0.830 |
| Meat,not fried (cooked) | 2.215(2.008-2.422) | 1.974(1.724-2.225) | 2.108(1.865-2.352) | 0.351 |
| Meat, fried | 2.597 (2.377-2.816) | 2.401(2.138-2.663) | 2.514(2.258-2.770) | 0.533 |
| Egg, fried | 0.961 (0.847-1.076) | 0.886(0.748-1.024) | 0.920(0.784-1.056) | 0.708 |
| Egg, boiled | 0.830 (0.727-0.933) | 0.823 (0.700-0.946) | 0.833 (0.711-0.955) | 0.994 |
| Mayonnaise | 0.566 (0.426-0.707) | 0.638 (0.469-0.807) | 0.646 (0.479-0.813) | 0.723 |
| Meat replacement products | 0.215 (0.087.-0.343) | 0.197(0.042-0.352) | 0.225(0.074-0.375) | 0.968 |
| Cheese | 8.147 (7.594-8.699) | 7.509(6.840-8.178) | 8.063(7.414-8.713) | 0.322 |
| Honey Jam | 1.749(1.530-1.967) | 1.673(1.409-1.937) | 1.690(1.426-1.954) | 0.897 |
| Chocolate_nut_based_spread | 1.777(1.529-2.026) | 1.859(1.561-2.158) | 2.032(1.739-2.325) | 0.427 |
| Butter, margarine on bread | 3.978(3.551-4.405) | 3.344(2.830-3.859) | 3.180(2.671-3.689) | 0.040 |
| Butter, margarine on bread low fat | 2.668 (2.289-3.047) | 2.240 (1.965-2.875) | 2.099 (1.644-2.553) | 0.170 |
| Ketchup | 1.508 (1.347-1.669) | 1.565 (1.372-1.757) | 1.350 (1.160-1.541) | 0.266 |
| Bread, white | 6.797 (6.256-7.338) | 6.187 (5.535-6.839) | 6.289 (5.652-6.925) | 0.298 |
| Bread, wholemeal | 3.964 (3.562-4.366) | 3.638 (3.156-4.120) | 3.413 (2.936-3.890) | 0.213 |
| Pasta,rice | 3.012 (2.783-3.240) | 2.920 (2.643-3.197) | 3.076 (2.805-3.347) | 0.729 |
| Cereals, milled, | 0.460 (0.358-0.562) | 0.428 (0.304-0.551) | 0.502 (0.379-0.625) | 0.703 |
| Processed meals: pizza, hamburguer, hot dog, falafel | 1.976 (1.748-2.203) | 1.375(1.101-1.649)* | 1.543(1.273-1.814) | 0.002 |
| Nuts,seed, dried fruit | 1.026(0.887-1.165) | 0.763(0.596-0.930) | 0.830(0.664-0.995) | 0.042 |
| Salty snacks | 0.938 (0.815-1.061) | 0.834 (0.685-0.983) | 1.070(0.925-1.215) | 0.082 |
| Savoury pastries | 0.717 (0.581-0.852) | 0.572 (0.408-0.736) | 0.676 (0.516-0.837) | 0.405 |
| Chocolate | 1.949 (1.702-2.197) | 1.725 (1.424-2.026) | 1.996 (1.700-2.292) | 0.396 |
| Candy, non chocolate | 2.204 (1.956-2.452) | 2.109(1.808-2.410) | 2.239(1.944-2.535) | 0.820 |
| Cake, pudding, cookies | 2.598(2.301-2.895) | 2.844(2.487-3.202) | 3.091(2.741-3.441) | 0.109 |
| Ice cream | 1.797 (1.605-1.988) | 1.265 (1.035-1.496)* | 1.451 (1.224-1.678) | 0.002 |

**Table S2.1.** Supplementary material. Mean consumption frequencies and 95% confidence interval (CI), by high sensitive C-reactive protein (hs-CRP) categorie in younger boys, controlling by body mass index z-score [23]. CRP I: hs-CRP detection limit (0.02mg/dL); CRP II: hs-CRP > 0.02 mg/dL and < 50th sex-specific percentile (0.06 mg/dL in boys and 0.07 in girls); of those with hs-CRP values over the detection limit CRP III: hs-CRP ≥ 50th sex-specific percentile (0.06 mg/dL in boys and 0.07 in girls) of those with hs-CRP values above the detection limit Post-hoc comparisons between hs-CRP groups with Bonferroni correction applied. *p<0.05 ref CRP I, † p<0.05 ref CRP II.
