# Supplementary material for: Food intake and inflammation in European children: the IDEFICS study
Source: Springer Nature journal article supplement (doi:10.1007/s00394-015-1054-3), 2015-09-29
Supplement: MOESM4 [file 8392462]

|  | ***Aged 6-<10 years*** | | | |
| --- | --- | --- | --- | --- |
|  | **CRP I** | **CRP II** | **CRP III** | **p-value** |
| **Food item** | **Mean (95% CI)** | **Mean (95% CI)** | **Mean (95% CI)** |  |
| Cooked vegetables | 4.264 (4.047-4.481) | 4.024(3.727-4.320) | 4.052(3.739-4.365) | 0.359 |
| Fried potatoes | 0.983 (0.883-1.082) | 1.110 (0.974-1.246) | 0.987(0.843-1.132) | 0.295 |
| Raw vegetables | 4.574 (4.287-4.862) | 3.940(3.546-4.333)* | 4.041(3.624-4.457) | 0.020 |
| Fresh fruit | 7.975(7.582-8.368) | 7.243 (6.704-7.782) | 7.184 (6.618-7.749) | 0.032 |
| Fresh fruit with sugar added | 1.651(1.380-1.922) | 2.191 (1.822-2.561) | 1.806 (1.418-2.195) | 0.069 |
| Water | 20.398 (19.668-21.127) | 19.665 (18.627-20.683) | 20.173 (19.118-21.228) | 0.514 |
| Fruit juice | 6.707 (6.180-7.233) | 7.517 (6.798-8.236) | 7.223 (6.462-7.983) | 0.187 |
| Soft drinks with sugar added | 2.865 (2.479-3.251) | 3.356 (2.826-3.886) | 2.755 (2.197-3.314) | 0.230 |
| Soft drink, diet | 1.241 (0.958-1.524) | 1.295 (0.909-1.681) | 1.209 (0.800-1.618) | 0.953 |
| Breakfast cereals, sugar added | 1.790 (2.565-3.015) | 3.105 (2.800-3.411) | 2.761 (2.439-3.083) | 0.196 |
| Breakfast cereals, no sugar | 1.386 (1.198-1.575) | 1.310(1.050-1.570) | 1.591 (1.320-1.861) | 0.311 |
| Milk total | 10.688 (10.172-11.204) | 10.514 (9.810-11.219) | 10.282 (9.538-11.027) | 0.689 |
| Yoghurt, no sugar | 1.217 (1.028-1.405) | 1.469(1.213-1.724) | 1.564 (1.294-1.834) | 0.088 |
| Yoghurt, sugar added | 3.650(3.389-3.911) | 3.976(3.617-4.335) | 3.366 (2.987-3.744) | 0.068 |
| Fish not fried | 0.976 (0.880-1.073) | 0.992(0.861-1.123) | 1.013 (0.875-1.152) | 0.916 |
| Fish, fried | 1.103 (1.004-1.203) | 0.996(0.860-1.132) | 1.044 (0.902-1.186) | 0.450 |
| Cold cuts, sausage | 4.628(4.359-4.898) | 4.232 (3.864-4.600) | 4.372 (3.982-4.761) | 0.213 |
| Meat,not fried (not cooked) | 2.306 (2.144-2.467) | 2.478(2.258-2.697) | 2.538(2.305-2.771) | 0.226 |
| Meat, fried | 2.644(2.494-2.794) | 2.357(2.152-2.562) | 2.561(2.342-2.779) | 0.086 |
| Egg, fried | 0.964(0.868-1.060) | 0.920(0.788-1.052) | 0.963(0.822-1.103) | 0.858 |
| Egg, boiled | 0.776 (0.686-0.866) | 0.779(0.656-0.903) | 0.679 (0.549-0.808) | 0.436 |
| Mayonnaise | 0.665(0.562-0.767) | 0.777(0.636-0.918) | 0.657(0.509-0.804) | 0.383 |
| Meat replacement products | 0.090(0.041-0.139) | 0.090(0.023-0.157) | 0.153(0.082-0.224) | 0.325 |
| Cheese | 8.599(8.136-9.063) | 8.494(7.857-9.131) | 8.042(7.377-8.707) | 0.409 |
| Honey Jam | 1.784(1.604-1.965) | 1.745(1.497-1.993) | 1.775(1.513-2.036) | 0.969 |
| Chocolate_nut_based_spread | 2.111(1.899-2.323) | 2.270(1.980-2.560) | 2.041(1.735-2.347) | 0.532 |
| Butter, margarine on bread | 4.246 (3.869-4.624) | 3.716(3.198-4.234) | 4.089(3.549-4.630) | 0.269 |
| Butter, margarine on bread low fat | 2.898 (2.563-3.233) | 2.723(2.260-3.186) | 2.841(2.357-3.325) | 0.836 |
| Ketchup | 1.777(1.625-1.929) | 1.772(1.564-1.979) | 1.814(1.595-2.032) | 0.955 |
| Bread, white | 7.506 (7.051-7.962) | 8.077(7.455-8.699) | 6.955(6.300-7.610) | 0.049 |
| Bread, wholemeal | 3.648(3.314-3.981) | 3.665(3.208-4.122) | 3.706 (3.226-4.187) | 0.981 |
| Pasta,rice | 2.931(2.777-3.084) | 2.740(2.530-2.949) | 2.875(2.653-3.097) | 0.355 |
| Cereals, milled, | 0.351(0.280-0.422) | 0.405(0.307-0.503) | 0.458(0.356-0.561) | 0.247 |
| Processed meals | 2.120(1.894-2.346) | 2.454(2.144-2.763) | 2.002(1.678-2.326) | 0.104 |
| Nuts,seed, dried fruit | 0.847 (0.737-0.958) | 0.865(0.714-1.016) | 0.737(0.579-0.896) | 0.452 |
| Salty snacks | 1.019(0.913-1.125) | 1.239(1.094-1.383) | 1.120(0.968-1.273) | 0.056 |
| Savoury pastries | 0.643(0.556-0.730) | 0.762 (0.643-0.882) | 0.788(0.663-0.912) | 0.118 |
| Chocolate | 1.931(1.760-2.103) | 2.208(1.974-2.442) | 2.070(1.823-2.317) | 0.172 |
| Candy, non chocolate | 2.030 (1.835-2.225) | 1.876(1.608-2.143) | 1.874 (1.592-2.156) | 0.557 |
| Cake, pudding, cookies | 2.433(2.224-2.643) | 2.461(2.175-2.747) | 2.850(2.549-3.151) | 0.074 |
| Ice cream | 1.656(1.503-1.809) | 1.599(1.389-1.809) | 1.544(1.322-1.765) | 0.717 |

**Table S2.2.** Supplementary material. Mean consumption frequencies and 95% confidence interval (CI), by high sensitive C-reactive protein (hs-CRP) categorie in older boys, controlling by body mass index z-score [23]. CRP I: hs-CRP detection limit (0.02mg/dL); CRP II: hs-CRP > 0.02 mg/dL and < 50th sex-specific percentile (0.06 mg/dL in boys and 0.07 in girls); of those with hs-CRP values over the detection limit CRP III: hs-CRP ≥ 50th sex-specific percentile (0.06 mg/dL in boys and 0.07 in girls) of those with hs-CRP values above the detection limit. Post-hoc comparisons between hs-CRP groups with Bonferroni correction applied. *p<0.05 ref CRP I, † p<0.05 ref CRP II.
